# Supplementary material
Source: PubMed Central journal article supplement (PMC6345277)
Supplement: NIHMS1002949-supplement-SI.pdf [file NIHMS1002949-supplement-SI.pdf]

# **Supplementary Materials**

## **Predicting Cotranscriptional Folding Kinetics For Riboswitch**

**Ting-ting SUN<sup>1,2‡</sup>, Chenhan ZHAO<sup>2‡</sup> and Shi-Jie CHEN<sup>2\*</sup>**

<sup>1</sup>Department of Physics, Zhejiang University of Science and Technology, Hangzhou 310023, P.R. China

<sup>2</sup>Department of Physics, Department of Biochemistry, and University of Missouri Informatics Institute, University of Missouri, Columbia, MO 65211

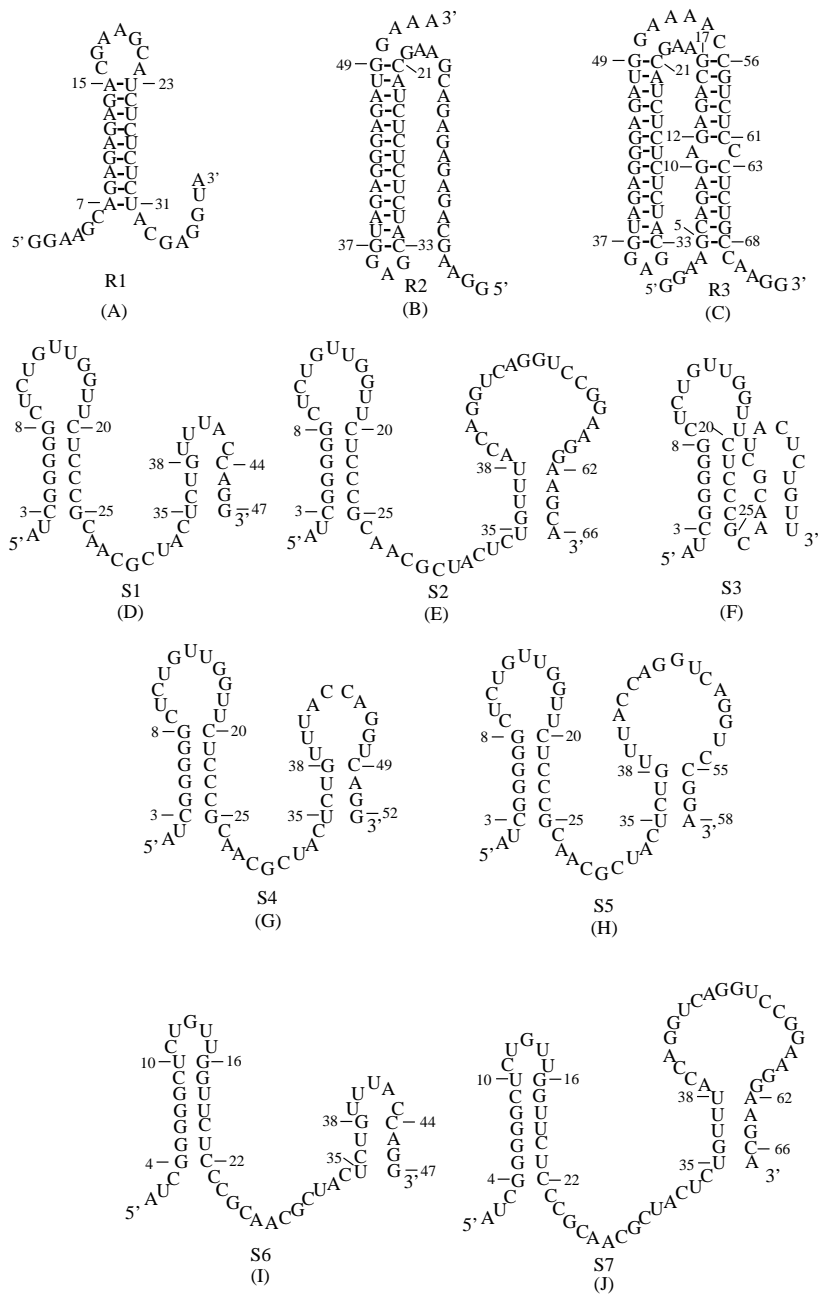

Figure S1: Identified kinetically important conformations for the 73-nt "reverse" RNA and SRP RNA. These conformations are determined from the complete conformational ensemble predictions. (A), (B) and (C) are secondary structures of R1, R2 and R3, which are predicted from the populational kinetics for the "reverse" sequence. (D), (F), (G), (F), (I) and (J) are the secondary structures of S1, S2, S3, S4, S5, S6 and S7, respectively. S1-S7 are predicted from the populational kinetics for the 90-nt SRP RNA.

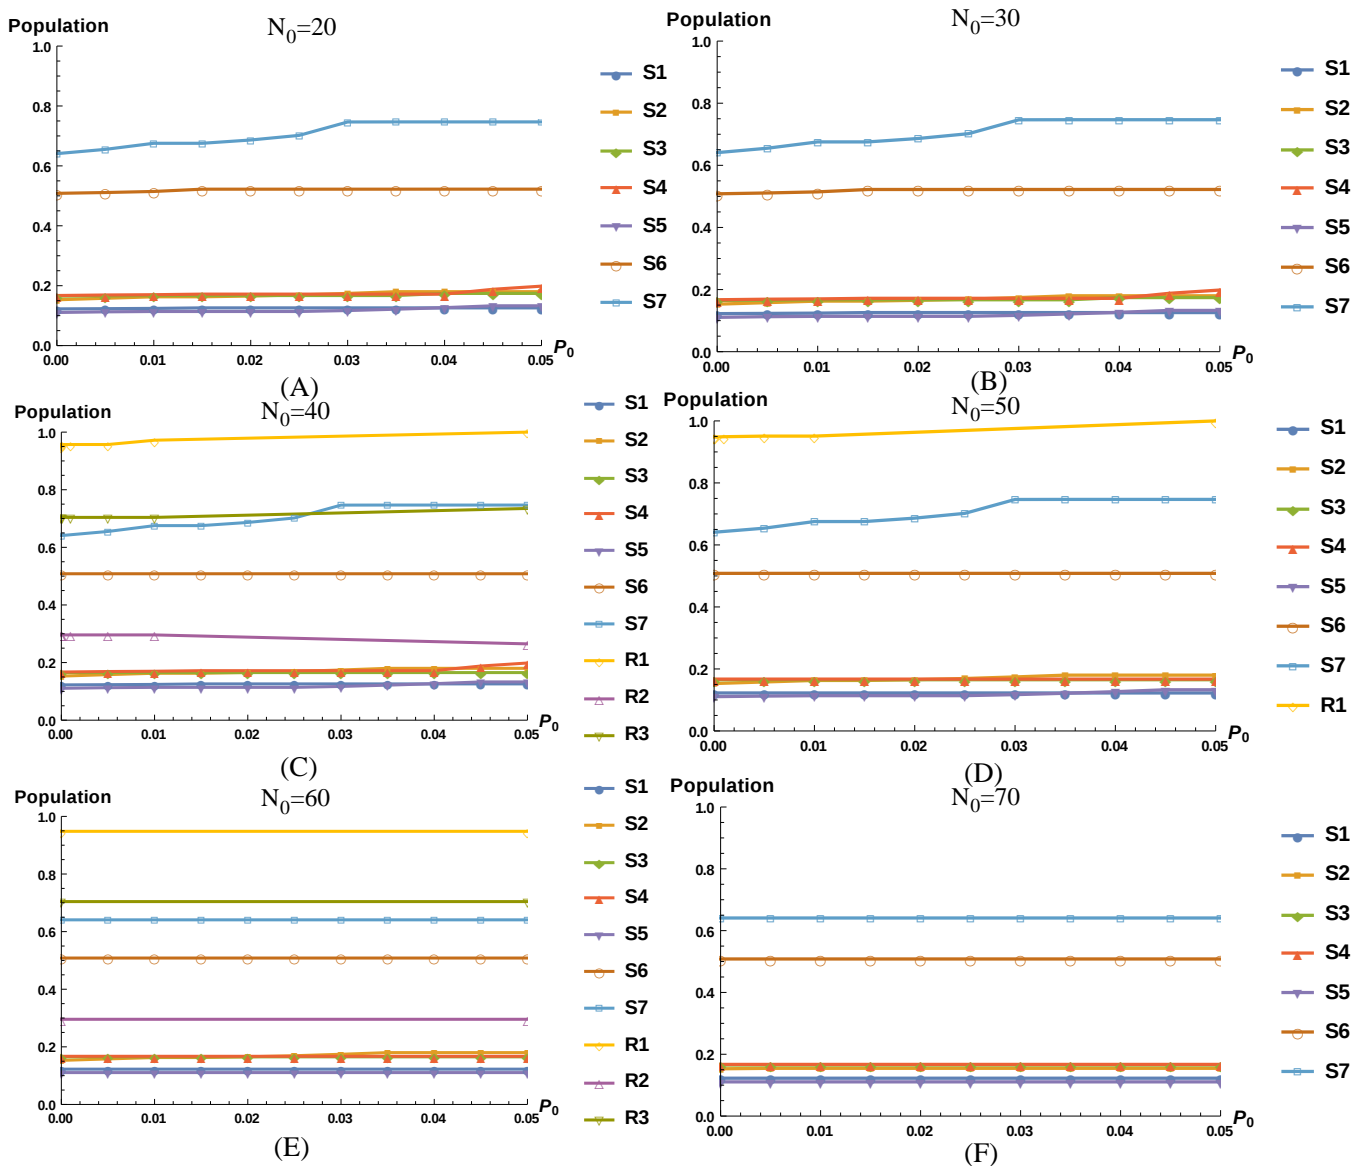

Figure S2: Test of the CRKR method for a 73-nt "reverse" RNA sequence<sup>1</sup> and 90-nt SRP RNA.<sup>2</sup> We show the predicted populations of the kinetically important states, namely, the states emerging with non-negligible populations, in the different step of cotranscriptional folding. The same kinetically important conformations are identified from both the CRKR method and the original complete conformation ensemble-based method.<sup>3</sup> The figure shows the results with the different population resampling-off parameter  $P_0$  and the different minimum chain length  $N_0$  for which CRKR is applied. We find that the population resampling approach gives nearly the same results as the complete conformational ensemble<sup>3</sup> for  $N_0 = 30, 40, 50$  and  $P_0$  below 1%, and for  $N_0 = 60, P_0$  below 5%. For the 102-nt *pbuE* riboswitch and 117-nt *E.Coli*. SRP RNA, we set  $N_0 = 50$  and  $P_0=0.5\%$ .

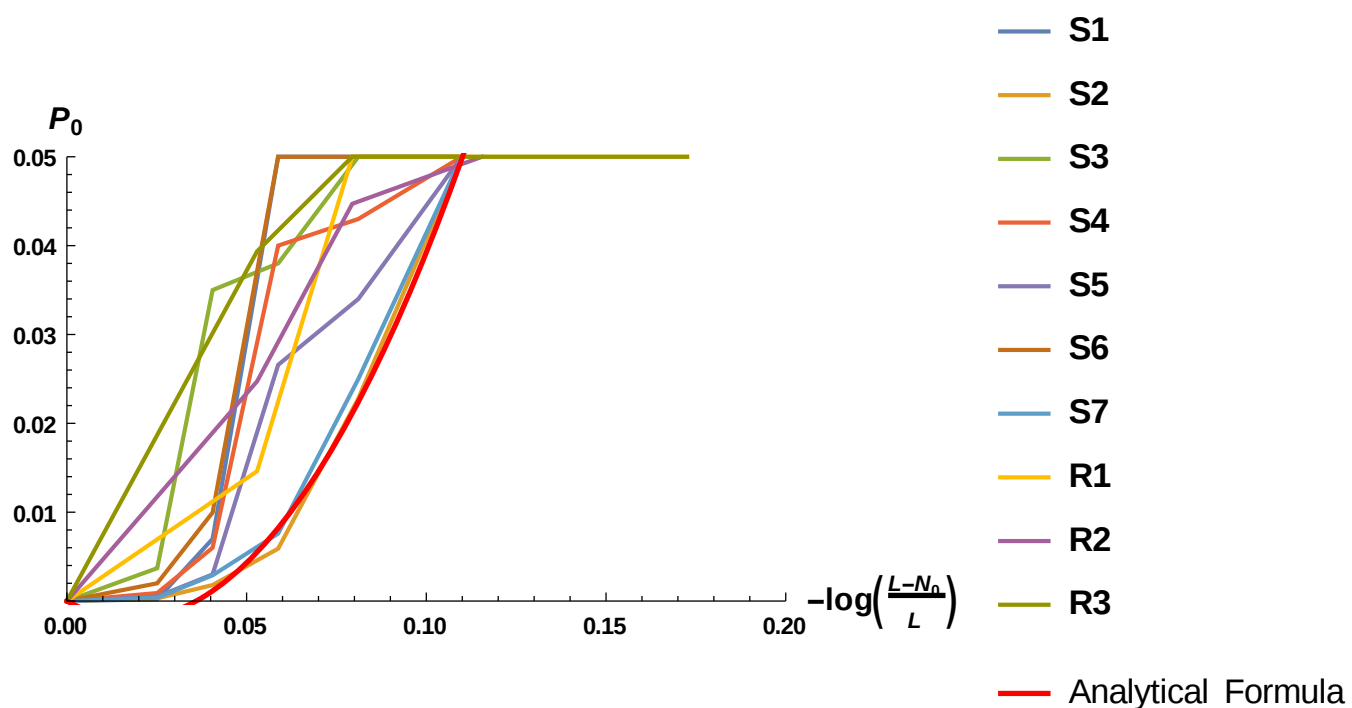

Figure S3: Parameter set for CRKR approach. In this figure, each curve indicates the minimum  $P_0$  determined from the populational kinetics test at the different  $N_0$ s for each kinetically important conformation. From the test curves, we fitted a red curve which can give parameter sets for other sequences.

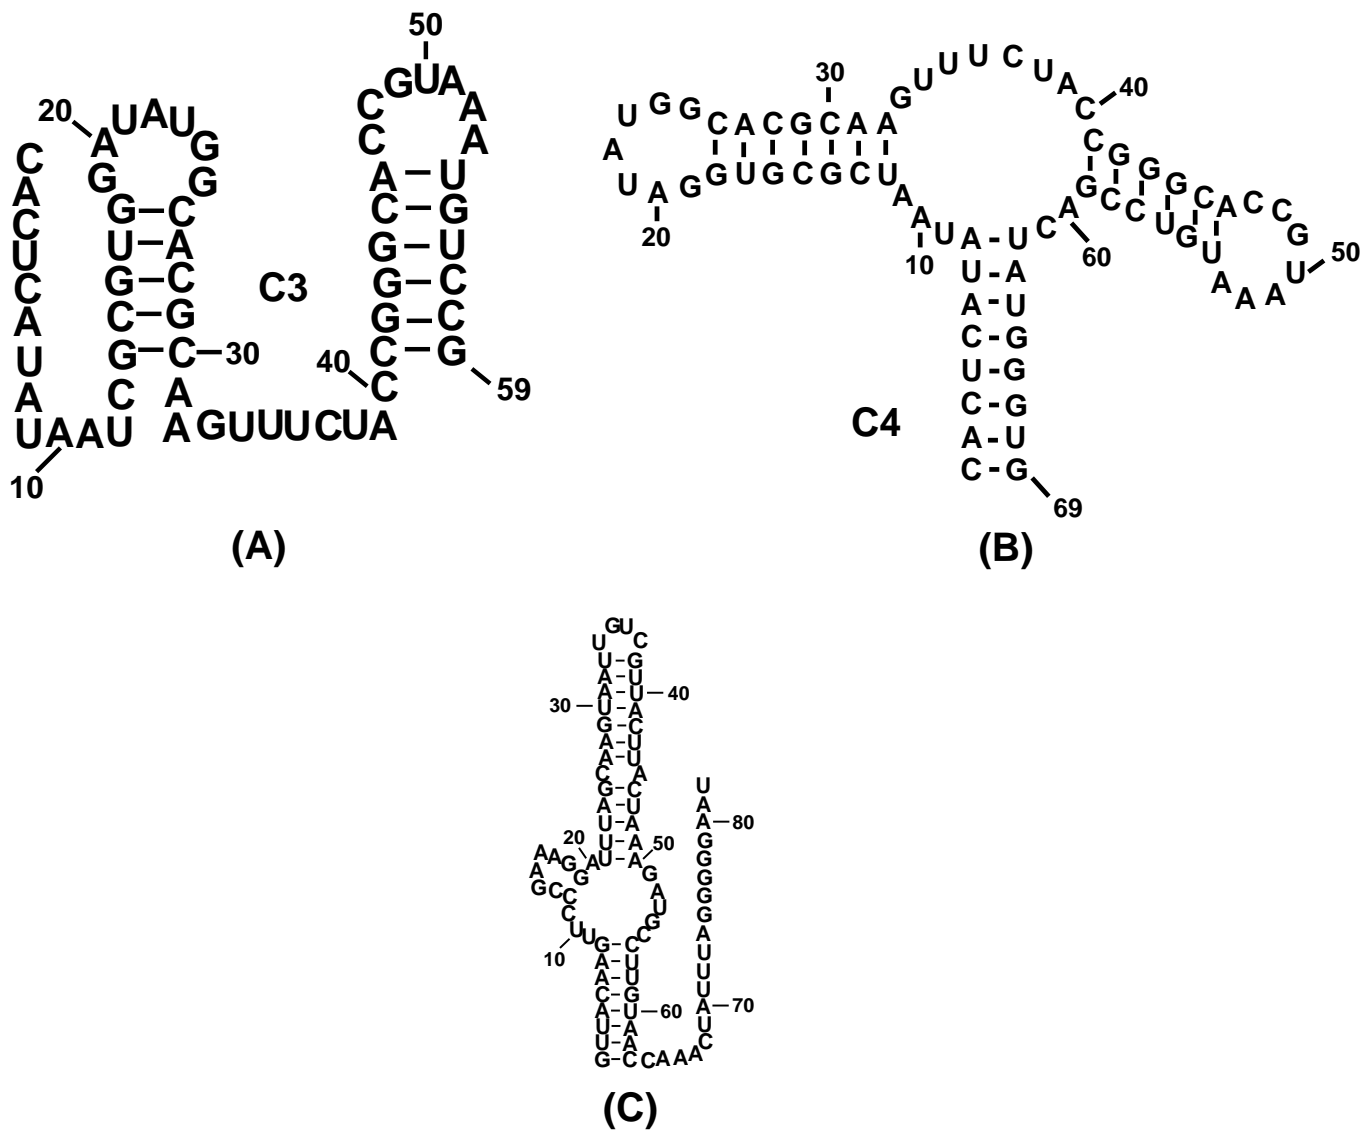

Figure S4: Kinetically important conformations used in the test of the CRKR method. (A) and (B) are the secondary structures of the intermediate state C3 and the final structure C4 for the 69-nt *xpt-pbuX* riboswitch, respectively.<sup>4</sup> (C) shows the secondary structure of the 82-nt *Enterococcus faecalis* SAM-III ( $S_{mk}$ ) riboswitch.<sup>5</sup>

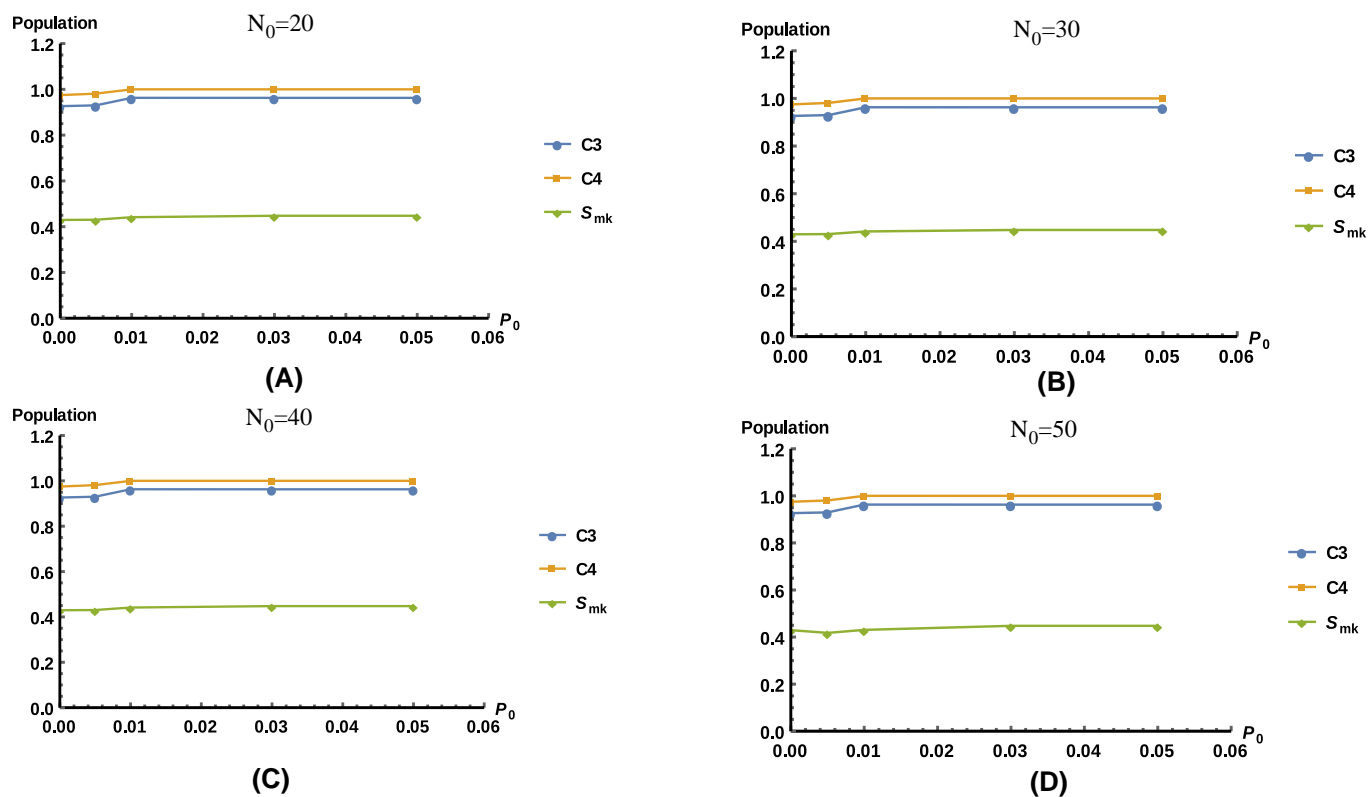

Figure S5: Test of the CRKR method using the 69-nt *xpt-pbuX* riboswitch and the 82-nt *Enterococcus faecalis* SAM-III ( $S_{mk}$ ) riboswitch. (A), (B), (C), and (D) show the comparisons between the populations calculated from the CRKR method and that from the complete conformational ensemble. We apply the CRKR method to the two riboswitches with different  $N_0$  and  $P_0$  values. The plot shows the populations of the intermediate state C3 at step 59, the final structure C4 at step 69, and the structure  $S_{mk}$  at step 82, respectively. As shown in (A), (B), (C), and (D), the results from the CRKR method are consistent with those from the complete ensemble ( $N_0=0$ ,  $P_0=0$ ). The CRKR method reduces the computational time and the number of states. For example, with the CRKR method, the number of states for the *xpt-pbuX* riboswitch at step 59 is reduced from 140 to 4 with  $N_0=20$ ,  $P_0=0.01$ . The computational time for *Enterococcus faecalis* SAM-III ( $S_{mk}$ ) riboswitch is reduced from 6 hours to 4 minutes with  $N_0=50$ ,  $P_0=0.01$ .

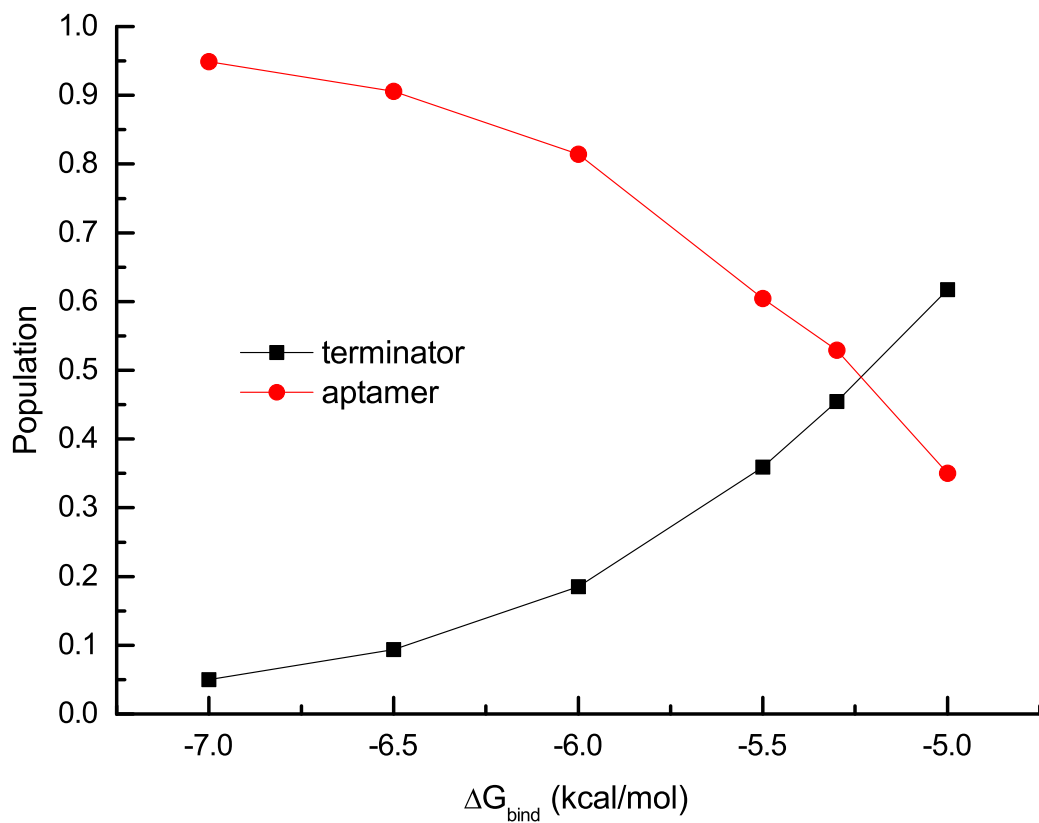

Figure S6: Population of the aptamer and the terminator as a function of the ligand binding-induced additional stability  $\Delta G_{bind}$  for the aptamer with no pulling force. Force spectroscopy experiment shows that the termination level is decreased to 50% in the presence of adenine. We choose the free energy parameter  $\Delta G_{bind}$  to be -5.3 kcal/mol, which is close to the experimentally determined value.

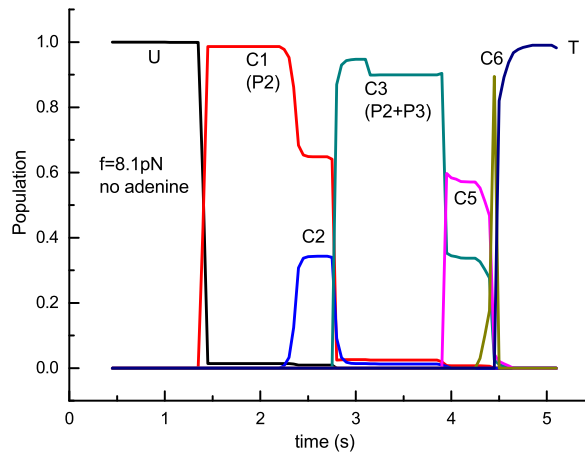

(A)

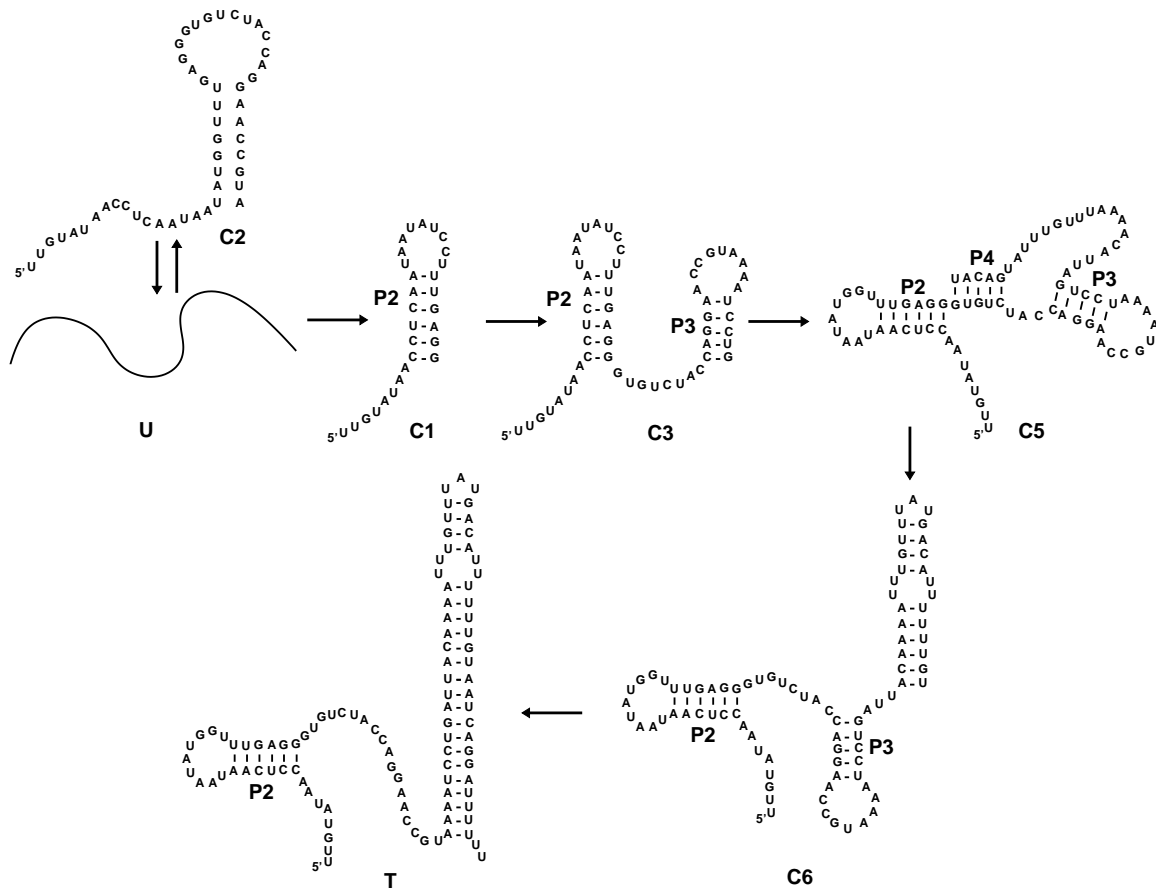

(B)

Figure S7: (A) The population kinetics for the cotranscriptional folding of the *pbuE* riboswitch under 8.1 pN pulling force and transcription speed 20 nt/s without the presence of adenine. There are 6 kinetically important states identified during the folding process, U (Black), C1 (Red), C2 (Blue), C3 (Dark Cyan), C4 (Magenta), and T (Dark Yellow). (B) The folding pathway inferred from the populational kinetics.



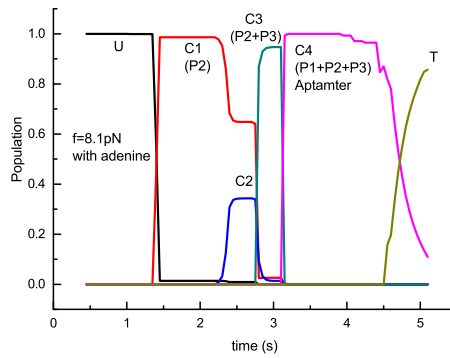

(A)

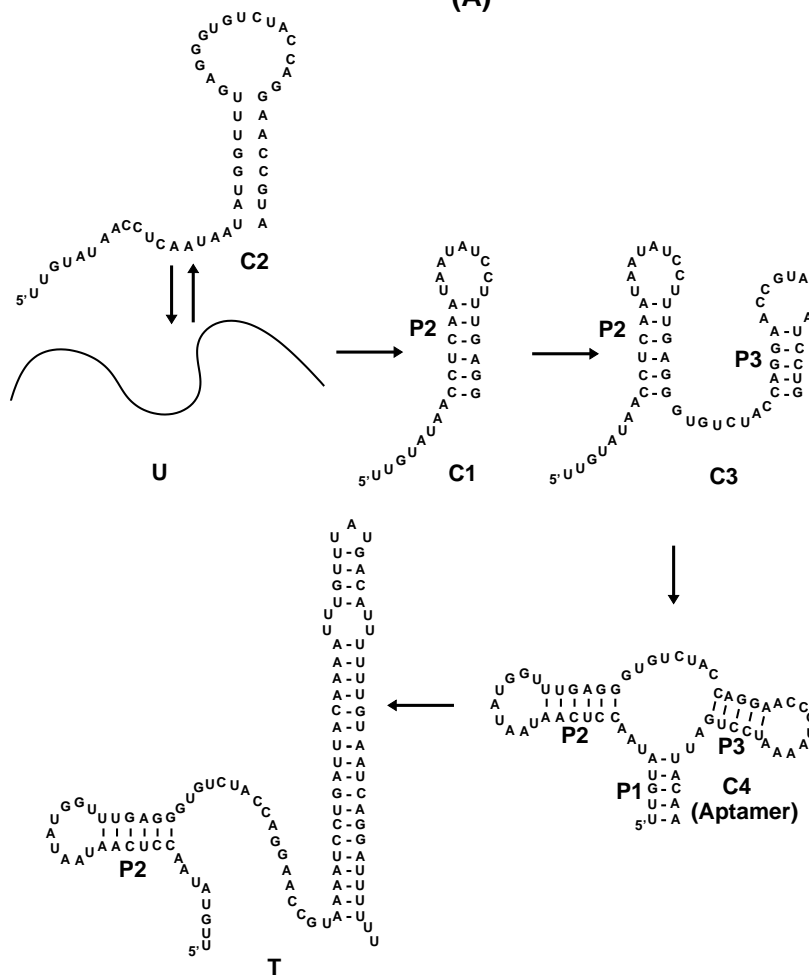

(B)

Figure S8: (A) The population kinetics for the cotranscriptional folding of the *pbuE* riboswitch under 8.1 pN pulling force and transcription speed 20 nt/s with the presence of adenine. There are also 6 kinetically important states identified during the folding process, U (Black), C1 (Red), C2 (Blue), C3 (Dark Cyan), C4 (Magenta), and T (Dark Yellow). (B) The folding pathway inferred from the populational kinetics.

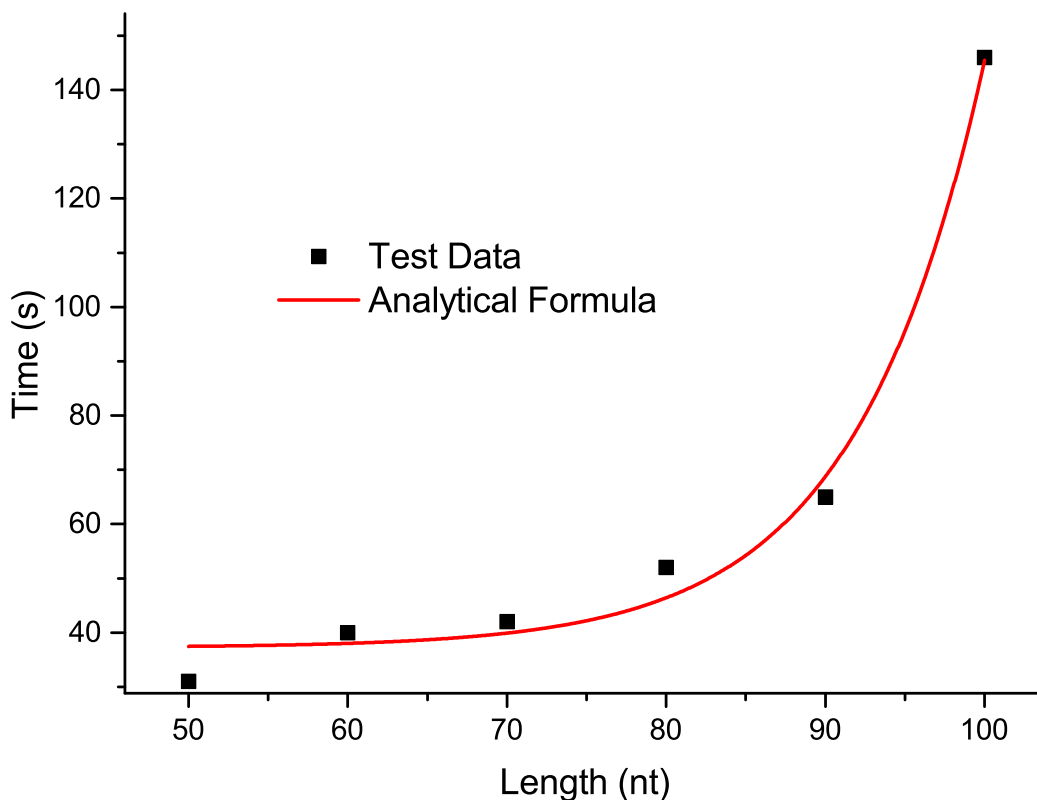

Figure S9: The computational time as a function of the chain length with the CRKR method. Red dots in the figure show the required computer time in order to make reliable predictions for the cotranscriptional folding kinetics for the give sequence length. The blue curve represents the fitted analytical formula. For (red) test data, we calculate the cotranscriptional folding for the different length  $L$  of the *E. Coli*. SRP RNA and for the different  $(N_0, P_0)$  parameters, we choose the one that can give the minimum time  $t$  required for an accurate prediction. For each length, we compare the population of the most populated state in the final step calculated from the complete ensemble ( $N_0=0, P_0=0$ ) with the one calculated from the CRKR method. If the predicted population of a state is in the range of  $[1 \pm (\frac{N_0}{L})^4] P_{\text{exact}}$ , where  $P_{\text{exact}}$  is the predicted population based on the complete conformational ensemble, we consider the result as a successful prediction. For  $L=50$  nt,  $P_0=1\%$  and  $N_0=20$  nt gives the minimum time  $t=31$  s. For  $L=60$  nt,  $P_0=5\%$  and  $N_0=30$  nt gives the minimum  $t=40$  s. For  $L=70$  nt,  $P_0=0.5\%$  and  $N_0=30$  nt gives the minimum  $t=42$  s. For  $L=80$  nt,  $P_0=0.5\%$  and  $N_0=30$  nt gives the minimum  $t=52$  s. For  $L=90$  nt,  $P_0=3\%$  and  $N_0=40$  nt gives the minimum  $t=65$  s. For  $L=100$  nt,  $P_0=1\%$  and  $N_0=40$  nt gives the minimum  $t=146$  s. The analytical formula  $t = 37.2429 + 4.72 * 10^{-4} * e^{(0.1234*L)}$  (sec) is fitted according to the test data. All calculations are performed on a PC with Intel(R) Xeon(R) CPU E5-1650 v3 CPU and 64 GB RAM.

Table S1: Computer (in seconds) on a PC with Intel(R) Xeon(R) CPU E5-1650 v3 CPU and 64 GB RAM for the different sequence length  $L$  of the *E. Coli*. SRP RNA with the different  $P_0$  and  $N_0$  parameters.

| $N_0 \backslash P_0$ | 0.5%   | 1%     | 3%     | 5%     | 10%    | 20%    | 30%    |
|----------------------|--------|--------|--------|--------|--------|--------|--------|
| $L=50$ nt            |        |        |        |        |        |        |        |
| 20 nt                | 32     | 31     | 32     | 31     | 32     | 31     | 32     |
| 30 nt                | 33     | 32     | 32     | 31     | 32     | 32     | 32     |
| 40 nt                | 37     | 37     | 37     | 36     | 37     | 37     | 37     |
| $L=60$ nt            |        |        |        |        |        |        |        |
| 20 nt                | 41     | 41     | 40     | 41     | 39     | 39     | 39     |
| 30 nt                | 41     | 42     | 41     | 40     | 41     | 40     | 41     |
| 40 nt                | 46     | 46     | 46     | 45     | 45     | 45     | 44     |
| 50 nt                | 262    | 262    | 260    | 262    | 263    | 269    | 268    |
| $L=70$ nt            |        |        |        |        |        |        |        |
| 20 nt                | 44     | 47     | 43     | 41     | 42     | 41     | 41     |
| 30 nt                | 42     | 43     | 42     | 43     | 43     | 42     | 42     |
| 40 nt                | 49     | 49     | 50     | 48     | 47     | 48     | 47     |
| 50 nt                | 282    | 280    | 274    | 275    | 275    | 275    | 275    |
| 60 nt                | 1977   | 1979   | 1983   | 1977   | 1974   | 1988   | 1988   |
| $L=80$ nt            |        |        |        |        |        |        |        |
| 20 nt                | 58     | 52     | 50     | 49     | 50     | 49     | 49     |
| 30 nt                | 52     | 52     | 50     | 49     | 51     | 52     | 48     |
| 40 nt                | 57     | 57     | 56     | 54     | 54     | 51     | 52     |
| 50 nt                | 290    | 288    | 282    | 283    | 284    | 283    | 285    |
| 60 nt                | 2008   | 1997   | 1996   | 1995   | 1995   | 1994   | 1994   |
| 70 nt                | 10970  | 10974  | 10968  | 10962  | 10960  | 10973  | 10961  |
| $L=90$ nt            |        |        |        |        |        |        |        |
| 20 nt                | 75     | 67     | 60     | 58     | 55     | 54     | 57     |
| 30 nt                | 77     | 70     | 61     | 59     | 60     | 56     | 56     |
| 40 nt                | 82     | 71     | 65     | 62     | 62     | 60     | 60     |
| 50 nt                | 315    | 304    | 297    | 290    | 291    | 291    | 288    |
| 60 nt                | 2019   | 2015   | 2007   | 1997   | 2003   | 2002   | 2003   |
| 70 nt                | 10988  | 10962  | 10964  | 10947  | 10960  | 10969  | 10959  |
| 80 nt                | 51442  | 52969  | 52910  | 52943  | 52804  | 525000 | 52474  |
| $L=100$ nt           |        |        |        |        |        |        |        |
| 20 nt                | 199    | 141    | 80     | 73     | 71     | 64     | 65     |
| 30 nt                | 199    | 142    | 80     | 73     | 72     | 65     | 66     |
| 40 nt                | 203    | 146    | 85     | 77     | 76     | 702    | 68     |
| 50 nt                | 438    | 379    | 314    | 307    | 304    | 301    | 298    |
| 60 nt                | 2140   | 2087   | 2030   | 2024   | 2018   | 2006   | 2008   |
| 70 nt                | 11107  | 11047  | 10973  | 10973  | 10909  | 10911  | 10882  |
| 90 nt                | 205520 | 214443 | 216114 | 215683 | 214963 | 214377 | 216603 |

### **Conformational sampling and 3D structure prediction**

For a given 2D structure, we first extract the motifs such as helices, hairpin loops, bulge loops from the 2D structure. For each non-helix motif we search our database VfoldMTF (<http://rna.physics.missouri.edu/vfoldMTF/index.html>) for the best template to identify the appropriate template structures. We then assemble the templates to construct the 3D scaffold. For motifs without available templates, we use a coarse-grained (CG) RNA model<sup>6</sup> where the Pyrimidines/purines are represented by 4/5 CG beads, respectively, and a knowledge-based force field to simulate the 3D structure. The simulation is carried out with Langevin dynamics in the modified LAMMPS packages.<sup>7</sup> The time step for the simulation is 0.5 fs, and each structure is simulated for 2000000 steps. We cluster the structures with an RMSD cut-off of 3 Å and choose the cluster center whose cluster has the largest population. Finally, we refine the 3D structure with 10000000 steps of energy minimization.

## References

- [1] Xayaphoummine, A.; Viasnoff, V.; Harlepp, S.; Isambert, H. Encoding Folding Paths of RNA Switches. *Nucleic Acids Res.* **2007**, *35*, 614-622.
- [2] Batey, R. T.; Rambo, R. P.; Lucast, L.; Rha, B.; Doudna, J. A. Crystal Structure of the Ribonucleoprotein Core of the Signal Recognition Particle. *Science.* **2000**, *287*, 1232-1239.
- [3] Zhao, P. N.; Zhang, W. B.; Chen, S. J. Cotranscriptional Folding Kinetics of Ribonucleic Acid Secondary Structure. *J. Chem. Phys.* **2011**, *135*, 245101.
- [4] Gong, S.; Wang, Y.; Wang, Z.; Zhang, W. Co-Transcriptional Folding and Regulation Mechanisms of Riboswitches. *Molecules.* **2017**, *22*, 1169.
- [5] Priyakumar, U. D. Atomistic details of the ligand discrimination mechanism of S MK/SAM-III riboswitch. *J. Phys. Chem. B.* **2010**, *114*, 9920-9925.
- [6] Zhang, D.; Chen, S. J. IsRNA: An Iterative Simulated Reference State Approach to Modeling Correlated Interactions in RNA Folding. *J Chem Theory Comput.* **2018**, *14*, 22302239.
- [7] Plimpton, S. Fast Parallel Algorithms for Short-range Molecular Dynamics. *J. Comput. Phys.* **1995**, *117*, 1-19.
